# Supplementary material
Source: publisher site journal article supplement (https://www.dovepress.com/article/587649)
Supplement: Supplementary file 1 [file 587649_Supplementary%20documents_R2.docx]

**Supplementary documents**

**Table S1. Participants’ demographic and histopathological characteristics**

| **Characteristic** | **dMMR (n = 54)** | **pMMR**  **(n= 158)** | **p-value** |
| --- | --- | --- | --- |
| Age (mean, SD) | 60.6 (13.8) | 60.4 (12.0) | 0.924 |
| Sex (number of males, %) | 32 (59.2%) | 88 (55.7%) | 0.648 |
| Tumor size  <5 cm  ≥5 cm | 26 (48.2%)  28 (51.8%) | 100 (63.3%)  58 (36.7%) | 0.050 |
| Tumor location |  |  | 0.004 |
| Right colon | 23 (42.6%) | 30 (19%) |  |
| Left colon | 9 (16.6%) | 27 (17.1%) |  |
| Sigmoid colon | 11 (20.4%) | 40 (25.3%) |  |
| Rectum | 11 (20.4%) | 61 (38.6%) |  |
| Histopathological types (n, %) |  |  | 0.423 |
| Non-mucinous adenocarcinoma | 48 (88.9%) | 146 (92.4%) |  |
| Mucinous adenocarcinoma | 6 (11.1%) | 12 (7.6%) |  |
| Lymphovascular Invasion (n, %) | 16 (29.6%) | 75 (47.5%) | 0.022 |
| Perineural Invasion (n, %) | 11 (20.4%) | 37 (23.4%) | 0.644 |
| Vascular invasion (n, %) | 7 (13%) | 49 (31%) | 0.009 |
| Tumor grade (n, %) |  |  | 0.001 |
| I | 7 (13%) | 2 (1.3%) |  |
| II | 46 (85.2%) | 154 (97.4%) |  |
| III | 1 (1.8%) | 2 (1.3%) |  |
| pTNM stage (n, %) |  |  | 0.042 |
| I | 9 (16.7%) | 23 (14.6%) |  |
| II | 28 (51.9%) | 55 (34.8%) |  |
| III | 14 (25.9%) | 50 (31.6) |  |
| IV | 3 (5.5%) | 30 (19%) |  |

Note: MMR = mismatch repair; d-MMR = **deficient** mismatch repair;

**Table S2. The fitted model of predicting dMutS using histopathological characteristics**

| **Coefficient** | **Estimate** | **Odds Ratio (95% CIs)** | **p** |
| --- | --- | --- | --- |
| (Intercept) | -2.00 | 0.14 (0.04-0.37) | 2.59 x 10-5 |
| Tumor size (> 5cm) | 1.10 | 3.02 (1.13-8.79) | 0.03 |
| p TNM stage (II) | -1.1 | 0.33 (0.10-1.12) | 0.07 |
| p TNM stage (III) | -0.65 | 0.52 (0.15-1.78) | 0.29 |
| p TNM stage (IV) | -2.69 | 0.07 (0.0005-0.63) | 0.01 |

**Table S3. Concordance between immunohistochemistry and Polymerase Chain Reaction (PCR) results**

|  | **pMMR** | **dMutL** | **dMutS** | **Dual dMutL-dMutS deficiency** |
| --- | --- | --- | --- | --- |
| **MSS** | 42 (87.5%) | 3 (6.25%) | 3 (6.25%) | 0 |
| **MSI** | 0 | 33 (68.75%) | 12 (25%) | 3 (6.25%) |

Note: MSS = microsatellite stability; MSI = microsatellite instability; pMMR = Proficient mismatch repair; dMutL = Deficient MutL complex; dMutS = Deficient MutS complex

**
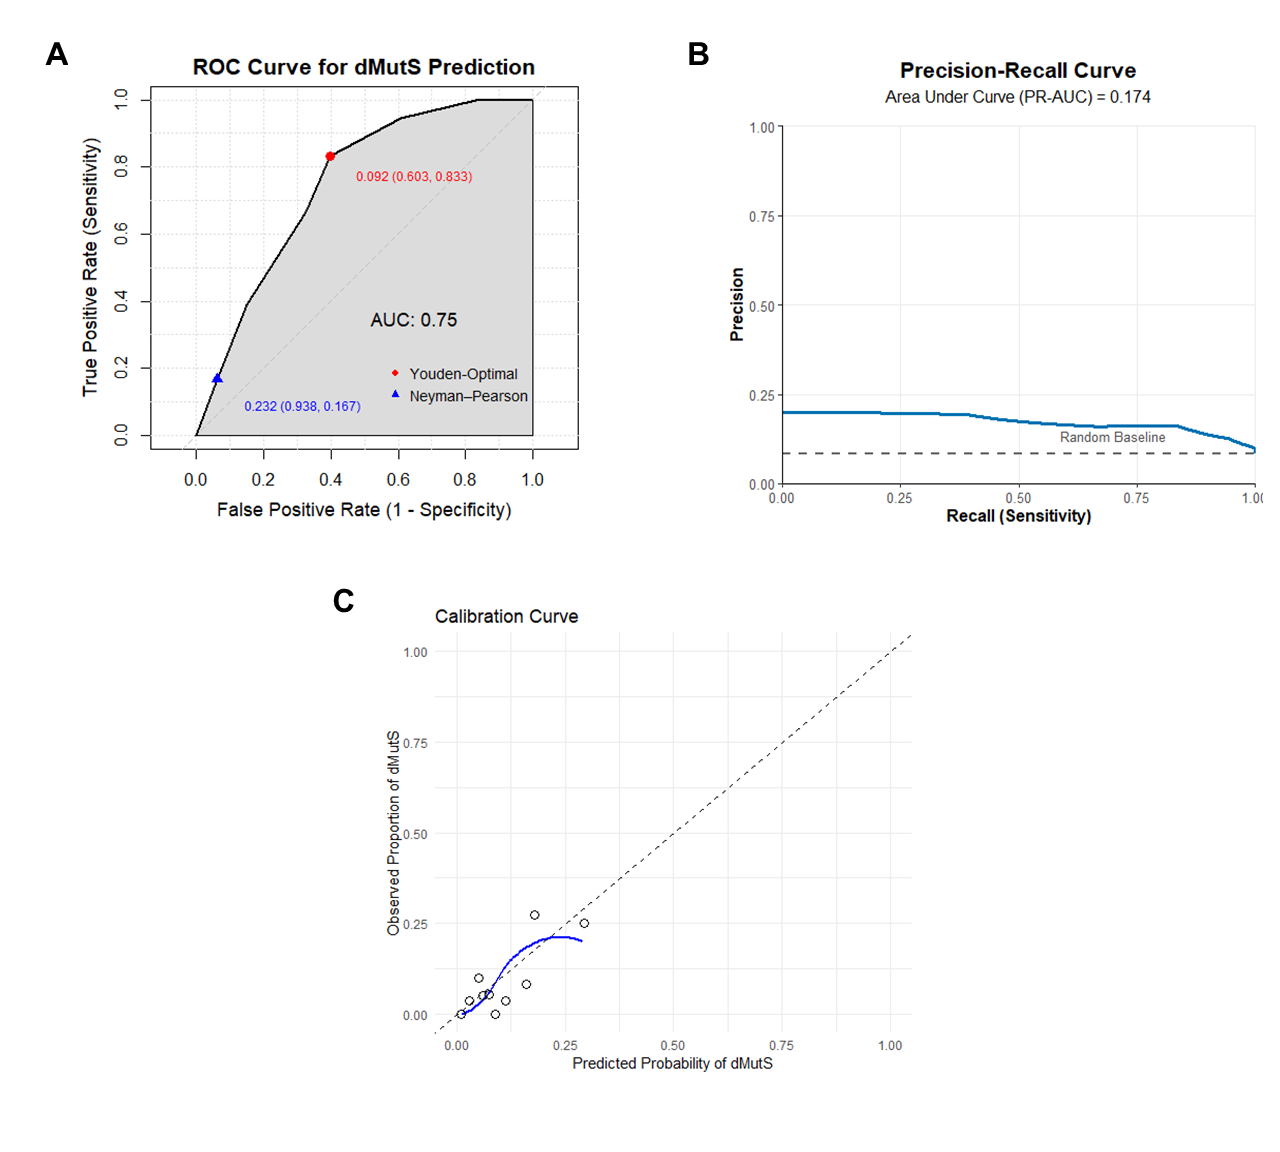
**

**Figure S1.** Performances of the model predicting dMutS. (A) The Receiver Operating Characteristic (ROC) curve with the area under the curve (AUC) of the model. (B) The precision-recall curve with the area under the curve (PR-AUC) of the model. (C) The calibration plot of the model.
